# Supplementary material for: Characterisation of the Clinical Pharmacokinetics of Actinomycin D and the Influence of ABCB1 Pharmacogenetic Variation on Actinomycin D Disposition in Children with Cancer
Source: Springer Nature journal article supplement (doi:10.1007/s40262-014-0153-2), 2014-06-26
Supplement: MOESM1 [file 9340768]

**Characterisation of the clinical pharmacokinetics of actinomycin D and  
the influence of ABCB1 pharmacogenetic variation on actinomycin D  
disposition in children with cancer**

**Christopher R. Hill, Michael Cole, Julie Errington, Ghada Malik, Alan V. Boddy  
and Gareth J. Veal**

**Supplementary Material**

**Supplementary Table S1.** Summary of pharmacokinetic data from 117 patients receiving Actinomycin D

| Sample time | No. of patients | Act D plasma concentration (µg/L) |         |         | CV (%) |
|-------------|-----------------|-----------------------------------|---------|---------|--------|
|             |                 | Median                            | Minimum | Maximum |        |
| 5 min       | 13              | 128                               | 64.7    | 186     | 27.9   |
| 15 min      | 101             | 24.4                              | 5.3     | 122     | 73.2   |
| 30 min      | 113             | 9.8                               | 3.3     | 40.7    | 57.0   |
| 1 h         | 16              | 6.3                               | 3.3     | 38.1    | 95.9   |
| 2 h         | 108             | 4.8                               | 1.4     | 24.8    | 52.4   |
| 4 h         | 103             | 3.7                               | 1.3     | 16.1    | 54.9   |
| 6 h         | 38              | 3.2                               | 1.2     | 9.1     | 53.9   |
| 8 h         | 35              | 2.8                               | 1.2     | 6.6     | 41.6   |
| 22h         | 12              | 1.8                               | 1.1     | 4       | 42.6   |
| 24h         | 73              | 1.8                               | 0.7     | 4.8     | 45.1   |
| 26h         | 38              | 1.9                               | 0.7     | 4.3     | 43.0   |

Abbreviations: Act D, actinomycin D; CV, coefficients of variation.

**Supplementary Table S2.** Comparison of population pharmacokinetic models 1 and 2.

| <b>Parameter</b>                        | <b>Model 1</b> | <b>Model 2</b> |
|-----------------------------------------|----------------|----------------|
| CL (L/h/70kg)                           | 11.9           | 13.9           |
| Q2 (L/h/70kg)                           | 8.1            | 15.3           |
| Q3 (L/h/70kg)                           | 22.4           | 36.2           |
| V1 (L/70kg)                             | 3.9            | 7.5            |
| V2 (L/70kg)                             | 11             | 17.1           |
| V3 (L/70kg)                             | 334            | 388            |
| <b>Inter individual variation (IIV)</b> |                |                |
| CL (%CV)                                | 42.9           | 28.3           |
| V1 (%CV)                                | 52.6           | 28.5           |
| Q3 (%CV)                                | -              | 34.9           |
| V3 (%CV)                                | -              | 41.1           |
| <b>Correlation</b>                      |                |                |
| CL ~ V1                                 | -0.34          | -              |
| CL ~ Q3                                 | -              | 0.78           |
| CL ~ V3                                 | -              | 0.75           |
| Q3 ~ V3                                 | -              | 0.61           |
| <b>Residual %CV</b>                     | 23.2           | 18.5           |
| Number of parameters                    | 10             | 14             |
| OFV                                     | 1573           | 1372           |

Abbreviations: CL, clearance; Q2 and Q3, inter-compartmental clearance values for compartments 2 and 3; V1, central volume of distribution; V2 and V3, volume of distribution of the second and third compartments; CV, coefficients of variation; OFV, objective function value.

**Supplementary Table S3.** Summary of toxicity data following Actinomycin D treatment (n=146)

| Toxicity            | No. of patients (%) |              |
|---------------------|---------------------|--------------|
|                     | All CTC grades      | Grades (3/4) |
| Granulocytes        | 63 (44)             | 50 (35)      |
| Leucocytes          | 60 (42)             | 37 (26)      |
| Haemoglobin         | 57 (39)             | 23 (16)      |
| Infection           | 22 (15)             | 19 (13)      |
| Platelets           | 28 (20)             | 13 (9)       |
| Fever               | 22 (15)             | 15 (10)      |
| ALT                 | 11 (8)              | 2 (1)        |
| Neuroconstipation   | 6 (4)               | 0            |
| Neuromotor          | 5 (4)               | 0            |
| AST                 | 3 (4)               | 1 (1)        |
| Neurosensory        | 3 (2)               | 1 (1)        |
| Bilirubin           | 3 (2)               | 0            |
| Neurocorticol       | 1 (1)               | 1 (1)        |
| Hepatic enlargement | 0                   | 0            |
| Ascites             | 0                   | 0            |
| Haemorrhage         | 0                   | 0            |

*Note: Toxicity grades based on National Cancer Institute Common Toxicity Criteria (version 3.0)*

Abbreviations: ALT, alanine transaminase; AST, aspartate aminotransferase; CTC, Common Toxicity Criteria

**Supplementary Table S4.** Genotype and allelic frequencies for the studied ABCB1 polymorphisms

| ABCB1 polymorphism | No. of patients with genotype (frequencies) |                                                  |                       | Allelic frequencies <sup>‡</sup> |      |
|--------------------|---------------------------------------------|--------------------------------------------------|-----------------------|----------------------------------|------|
|                    | Allele <sup>†</sup>                         | Heterozygous                                     | Allele 2 <sup>†</sup> | p                                | q    |
| 1236 C>T           | 47 (0.34)                                   | 64 (0.46)                                        | 29 (0.21)             | 0.56                             | 0.44 |
| 2677G>T/A          | 36 (0.26)                                   | GT – 66 (0.47)<br>GA – 9 (0.06)<br>TA – 3 (0.02) | 26 (0.19)             | 0.53                             | 0.43 |
| 3435C>T            | 32 (0.23)                                   | 69 (0.49)                                        | 39 (0.28)             | 0.48                             | 0.53 |

<sup>†</sup>Allele 1- homozygous for allele 1, Allele 2 – homozygous for allele 2

<sup>‡</sup>Hardy-Weinberg notation for allele frequencies (p, frequency for allele 1; q, frequency for allele 2)

**Supplementary Table S5.** Effect of ABCB1 polymorphisms on Actinomycin D clearance

| ABCB1 Polymorphism | Mean Act D Clearance L/h (L/h/m <sup>2</sup> ) |                                               |                       | Significance <sup>‡</sup> |
|--------------------|------------------------------------------------|-----------------------------------------------|-----------------------|---------------------------|
|                    | Allele 1 <sup>†</sup>                          | Heterozygous                                  | Allele 2 <sup>†</sup> |                           |
| 1236C>T            | 5.8 (6.7)                                      | 5.7 (6.5)                                     | 5.8 (6.4)             | 0.99 (0.87)               |
| 2677G>T/A          | 6.1 (7.0)                                      | 5.7 (6.6)<br>GA – 5.5 (5.1)<br>TA – 5.2 (2.7) | 5.9 (6.3)             | 0.92 (0.5)                |
| 3435C>T            | 6.1 (6.6)                                      | 5.5 (6.7)                                     | 6.1 (6.2)             | 0.77 (0.68)               |

<sup>†</sup>Allele 1- homozygous for allele 1, Allele 2 – homozygous for allele 2

<sup>‡</sup>Statistical analysis performed was the one-way ANOVA. One test was performed per genotype, assessing global significance between genotype and CL-FSA. p<0.002 accepted as significant.
